# Supplementary material for: Uncovering the essence of moving experiences in Japanese culture: Development and validation of a kando reaction scale
Source: PubMed Central journal article supplement (PMC11620437; doi:10.1371/journal.pone.0311905), 2024-12-05
Supplement: pone.0311905.s002.pdf [file pone.0311905.s002.pdf]

S1 Table. The *kando* reaction scale in Japanese alongside its English equivalents.

Instruction in Japanese: あなたが体験した「人生で最も感動した出来事」に関連してあなた自身が感じたことをお尋ねします。そのときのあなた自身が下記の項目をどの程度強く感じたかを思い出して、1が「全く感じなかった」、7が「非常に強く感じた」となるように選んでください。

Instruction in English: “We would like to ask you about what you felt in connection to “the most significant *kando* events” you have experienced. Please rate the extent to which you felt the following feelings between 1 and 7, with one being ‘Did not feel at all’ and seven being ‘Incredibly strong.’

|                                                                         | Japanese Originals                 | English (back-translated)                                                             |
|-------------------------------------------------------------------------|------------------------------------|---------------------------------------------------------------------------------------|
| P1                                                                      | 喜んだ                                | I was joyful                                                                          |
| P2                                                                      | 嬉しかった                              | I was happy                                                                           |
| P3                                                                      | 笑顔になった                             | I was smiling                                                                         |
| E1                                                                      | 爽快感があった                            | I felt exhilarated                                                                    |
| E2                                                                      | スッキリした                             | I felt refreshed                                                                      |
| E3                                                                      | ウキウキして気持ちが軽くなった                    | I was cheerful and my feelings were elevated                                          |
| E4                                                                      | 達成感を覚えた                            | I felt a sense of accomplishment                                                      |
| E5                                                                      | 快かった                               | It was pleasant                                                                       |
| H1                                                                      | 不安を感じた                             | I felt anxious                                                                        |
| H2                                                                      | 恐怖を感じた                             | I felt scared                                                                         |
| H3                                                                      | 不快だった                              | It was unpleasant                                                                     |
| H4                                                                      | つらかった                              | It was emotionally difficult                                                          |
| K1                                                                      | 心が動かされた                            | It stirred my heart                                                                   |
| K2                                                                      | 心を打たれた                             | It touched my heart                                                                   |
| K3                                                                      | 感動した                               | I felt <i>kando</i>                                                                   |
| K4                                                                      | 胸の中に何らかの感覚があった                     | There was some manner of sensation in my chest                                        |
| K5                                                                      | 当初の予想を上回る心の動きがあった                  | It was even more moving than initially expected                                       |
| T1                                                                      | 涙が出た                               | I cried                                                                               |
| T2                                                                      | 目が潤んだ                              | I was close to the tears                                                              |
| W1                                                                      | 胸の中にあたたかい感覚があった                    | There was a warm sensation in my chest                                                |
| W2                                                                      | 心があたたまった                           | It was heartwarming                                                                   |
| O1                                                                      | 途中つらいことや苦しいことがあったが、最後にはポジティブなことだった | While it was happening, it was difficult and painful, but in the end, it was positive |
| O2                                                                      | 途中、不安や心配事があったが、最後には解消された           | While it was happening, I had anxieties and worries, but they were gone by the end    |
| O3                                                                      | 悲しみが喜びに変化した                        | Sadness changed to joy                                                                |
| G1                                                                      | 鳥肌が立った                             | I had goosebumps                                                                      |
| G2                                                                      | ゾクゾクした                             | I shivered                                                                            |
| G3                                                                      | 息がつまった                             | I lost my breath                                                                      |
| A1                                                                      | 畏怖を感じた                             | I felt awe                                                                            |
| A2                                                                      | 畏敬を感じた                             | I felt veneration                                                                     |
| T1                                                                      | 神秘的な力を感じた                          | I felt a mysterious power                                                             |
| T2                                                                      | 強大な力を感じた                           | I felt a great power                                                                  |
| S1                                                                      | 驚いた                                | I was surprised                                                                       |
| S2                                                                      | 自分の理解を超えていた                        | It was beyond my understanding                                                        |
| The following items were excluded from the <i>kando</i> reaction scale. |                                    |                                                                                       |
|                                                                         | 悲しかった                              | I was sad                                                                             |
|                                                                         | 興奮した                               | I was excited                                                                         |
|                                                                         | 鎮静した                               | I felt calm                                                                           |
|                                                                         | 覚醒した                               | I felt awakened                                                                       |
|                                                                         | 共感した                               | I felt empathy                                                                        |
|                                                                         | 自分の考え方に変化があった                      | There was a change in my thinking                                                     |
|                                                                         | 胸が締め付けられた                          | My chest tightened                                                                    |
|                                                                         | 言葉を失った                             | I was speechless                                                                      |
|                                                                         | 元気が出た                              | I felt uplifted                                                                       |
|                                                                         | 時間があっという間に過ぎた                      | Time passed in the blink of an eye                                                    |

\* Note that the survey in this study was conducted online and the items listed here were randomly presented to participants.
