# Supplementary material for: Uncovering the essence of moving experiences in Japanese culture: Development and validation of a kando reaction scale
Source: PubMed Central journal article supplement (PMC11620437; doi:10.1371/journal.pone.0311905), 2024-12-05
Supplement: pone.0311905.s003.pdf [file pone.0311905.s003.pdf]

S2 Table. Inter-factor correlations of the *kando* reaction scale computed using confirmatory factor analysis.

|                      | F1   | F2   | F3   | F4   | F5   | F6   | F7   | F8   | F9   | F10  | F11  |
|----------------------|------|------|------|------|------|------|------|------|------|------|------|
| F1 Positive emotions | 1.00 |      |      |      |      |      |      |      |      |      |      |
| F2 Exhilaration      | .78  | 1.00 |      |      |      |      |      |      |      |      |      |
| F3 Hardship          | -.42 | -.29 | 1.00 |      |      |      |      |      |      |      |      |
| F4 <i>Kando</i>      | .59  | .58  | -.22 | 1.00 |      |      |      |      |      |      |      |
| F5 Tears             | .18  | .12  | .08  | .58  | 1.00 |      |      |      |      |      |      |
| F6 Warmth            | .74  | .53  | -.31 | .80  | .52  | 1.00 |      |      |      |      |      |
| F7 Overcome          | .32  | .38  | .40  | .29  | .30  | .31  | 1.00 |      |      |      |      |
| F8 Goosebumps        | .27  | .64  | .09  | .58  | .32  | .23  | .26  | 1.00 |      |      |      |
| F9 Awe               | -.16 | .08  | .53  | .13  | .07  | -.11 | .20  | .49  | 1.00 |      |      |
| F10 Transcendence    | .43  | .59  | .12  | .73  | .41  | .51  | .39  | .73  | .47  | 1.00 |      |
| F11 Surprise         | .31  | .50  | .20  | .67  | .33  | .37  | .33  | .75  | .48  | .88  | 1.00 |
